# Supplementary material for: Dehydrocurvularin is a potent antineoplastic agent irreversibly blocking ATP-citrate lyase: evidence from chemoproteomics
Source: Royal Society of Chemistry journal article supplement (doi:10.1039/c9cc00256a), 2019-01-01
Supplement: c9cc00256a1.pdf [file c9cc00256a1.pdf]

**Electronic Supplementary Material (ESI) for**

**Dehydrocurvularin is a potent antineoplastic agent irreversibly  
blocking ATP-citrate lyase: Evidence from chemoproteomics**

Zhangshuang Deng,<sup>abc</sup> Nai-Kei Wong,<sup>d</sup> Zhiyong Guo,<sup>b</sup> Kun Zou,<sup>b</sup> Youli Xiao,<sup>e</sup> and Yiqing Zhou<sup>\*ae</sup>

- a. School of Biotechnology and Food Engineering, Changshu Institute of Technology, Changshu, Jiangsu 215500, China
- b. Hubei Key Laboratory of Natural Products Research and Development, College of Biological and Pharmaceutical Sciences, China Three Gorges University, Yichang, 443002, China
- c. Key Laboratory of Three Gorges Regional Plant Genetics & Germplasm Enhancement, China Three Gorges University, Yichang 443002, China
- d. Department of Infection Diseases, Shenzhen Third People's Hospital, The Second Hospital Affiliated to Southern University of Science and Technology, Shenzhen 518112, China
- e. CAS Center for Excellence in Molecular Plant Sciences, Institute of Plant Physiology and Ecology, Chinese Academy of Sciences, Shanghai 200032, China

\* Corresponding author

Dr. Yiqing Zhou

School of Biotechnology and Food Engineering, Changshu Institute of Technology, Changshu, Jiangsu 215500, China

CAS Center for Excellence in Molecular Plant Sciences, Institute of Plant Physiology and Ecology, Chinese Academy of Sciences, Shanghai 200032, China

Email: [zhyq2012@gmail.com](mailto:zhyq2012@gmail.com)

## **Table of Contents**

|                                              |                    |
|----------------------------------------------|--------------------|
| <b>1. Supplementary Tables and Figures</b>   | <b>pages 3-15</b>  |
| <b>2. Biological Experimental Procedures</b> | <b>pages 16-19</b> |
| <b>3. Chemistry</b>                          | <b>pages 20-23</b> |

# 1. Supplementary Tables and Figures

**Supplementary Table S1.** The IC<sub>50</sub> values (μM) of DCV and its derivatives in cancerous (HeLa, Jurkat, HCT116, K562) and normal (CD4, CHO) cells.

|        | DCV         | CV   | 1           | 2           | DCV-yne     | CV-yne |
|--------|-------------|------|-------------|-------------|-------------|--------|
| HeLa   | 3.86 ± 0.66 | >100 | 5.52 ± 0.78 | 17.6 ± 2.26 | 6.89 ± 0.81 | >100   |
| Jurkat | 1.55 ± 0.24 | >100 | 1.64 ± 0.13 | 8.22 ± 1.38 | 3.50 ± 0.46 | >100   |
| HCT116 | 4.60 ± 0.82 | >100 | 8.28 ± 0.47 | 25.5 ± 2.64 | 12.2 ± 1.56 | >100   |
| K562   | 3.66 ± 0.24 | >100 | 2.66 ± 0.25 | 7.21 ± 0.64 | 7.48 ± 0.88 | >100   |
| CD4    | 19.6 ± 0.86 | >100 | 25.8 ± 1.20 | >100        | 28.4 ± 1.35 | >100   |
| CHO    | 29.8 ± 4.44 | >100 | >100        | >100        | 48.6 ± 3.46 | >100   |

**Supplementary Table S2.** Proteins identified from the pull-down/LC-MS experiments.

| Accession | Description                                                                                 | Ratio-1st | Ratio-2nd | Average Ratio | p-Value |
|-----------|---------------------------------------------------------------------------------------------|-----------|-----------|---------------|---------|
| P53396    | ATP-citrate synthase OS=Homo sapiens GN=ACLY PE=1 SV=3                                      | 4.93      | 4.89      | 4.91          | 0.0013  |
| Q3SXM5    | Inactive hydroxysteroid dehydrogenase-like protein 1 OS=Homo sapiens GN=HSDL1 PE=1 SV=3     | 1.76      | 2.79      | 2.27          | 0.1414  |
| P45880    | Voltage-dependent anion-selective channel protein 2 OS=Homo sapiens GN=VDAC2 PE=1 SV=2      | 2.28      | 2.21      | 2.25          | 0.0096  |
| P20645    | Cation-dependent mannose-6-phosphate receptor OS=Homo sapiens GN=M6PR PE=1 SV=1             | 2.43      | 1.81      | 2.12          | 0.0920  |
| Q9Y277    | Voltage-dependent anion-selective channel protein 3 OS=Homo sapiens GN=VDAC3 PE=1 SV=1      | 2.31      | 1.81      | 2.06          | 0.0773  |
| P27797    | Calreticulin OS=Homo sapiens GN=CALR PE=1 SV=1                                              | 1.64      | 1.62      | 1.63          | 0.0056  |
| P62979    | Ubiquitin-40S ribosomal protein S27a OS=Homo sapiens GN=RPS27A PE=1 SV=2                    | 1.74      | 1.41      | 1.58          | 0.0676  |
| P05141    | ADP/ATP translocase 2 OS=Homo sapiens GN=SLC25A5 PE=1 SV=7                                  | 1.41      | 1.72      | 1.57          | 0.0637  |
| P35579    | Myosin-9 OS=Homo sapiens GN=MYH9 PE=1 SV=4                                                  | 1.58      | 1.28      | 1.43          | 0.0646  |
| P10809    | 60 kDa heat shock protein, mitochondrial OS=Homo sapiens GN=HSPD1 PE=1 SV=2                 | 1.37      | 1.48      | 1.42          | 0.0226  |
| Q06323    | Proteasome activator complex subunit 1 OS=Homo sapiens GN=PSME1 PE=1 SV=1                   | 1.73      | 1.09      | 1.41          | 0.1406  |
| Q7Z6Z7    | E3 ubiquitin-protein ligase HUWE1 OS=Homo sapiens GN=HUWE1 PE=1 SV=3                        | 1.50      | 1.20      | 1.35          | 0.0702  |
| Q9NZ08    | Endoplasmic reticulum aminopeptidase 1 OS=Homo sapiens GN=ERAP1 PE=1 SV=3                   | 0.96      | 1.72      | 1.34          | 0.1736  |
| O60506    | Heterogeneous nuclear ribonucleoprotein Q OS=Homo sapiens GN=SYNCRIP PE=1 SV=2              | 1.58      | 0.96      | 1.27          | 0.1533  |
| P12268    | Inosine-5'-monophosphate dehydrogenase 2 OS=Homo sapiens GN=IMPDH2 PE=1 SV=2                | 1.30      | 1.21      | 1.26          | 0.0215  |
| P49588    | Alanine--tRNA ligase, cytoplasmic OS=Homo sapiens GN=AARS PE=1 SV=2                         | 1.29      | 1.15      | 1.22          | 0.0346  |
| O75746    | Calcium-binding mitochondrial carrier protein Aralar1 OS=Homo sapiens GN=SLC25A12 PE=1 SV=2 | 1.51      | 0.90      | 1.20          | 0.1557  |
| P68363    | Tubulin alpha-1B chain OS=Homo sapiens GN=TUBA1B PE=1 SV=1                                  | 1.11      | 1.28      | 1.20          | 0.0428  |
| O00410    | Importin-5 OS=Homo sapiens GN=IPO5 PE=1 SV=4                                                | 0.70      | 1.55      | 1.12          | 0.2291  |
| Q00325    | Phosphate carrier protein, mitochondrial OS=Homo sapiens GN=SLC25A3 PE=1 SV=2               | 1.04      | 1.11      | 1.08          | 0.0199  |
| P61978    | Heterogeneous nuclear ribonucleoprotein K OS=Homo sapiens GN=HNRNPK PE=1 SV=1               | 1.17      | 0.96      | 1.07          | 0.0626  |
| P22234    | Multifunctional protein ADE2 OS=Homo sapiens GN=PAICS PE=1 SV=3                             | 1.05      | 1.07      | 1.06          | 0.0067  |
| O75533    | Splicing factor 3B subunit 1 OS=Homo sapiens GN=SF3B1 PE=1 SV=3                             | 1.15      | 0.87      | 1.01          | 0.0864  |

|        |                                                                                              |      |      |      |        |
|--------|----------------------------------------------------------------------------------------------|------|------|------|--------|
| Q12906 | Interleukin enhancer-binding factor 3 OS=Homo sapiens GN=ILF3 PE=1 SV=3                      | 0.84 | 1.06 | 0.95 | 0.0741 |
| P48643 | T-complex protein 1 subunit epsilon OS=Homo sapiens GN=CCT5 PE=1 SV=1                        | 1.23 | 0.64 | 0.93 | 0.1928 |
| P07237 | Protein disulfide-isomerase OS=Homo sapiens GN=P4HB PE=1 SV=3                                | 0.88 | 0.95 | 0.92 | 0.0237 |
| Q15067 | Peroxisomal acyl-coenzyme A oxidase 1 OS=Homo sapiens GN=ACOX1 PE=1 SV=3                     | 1.04 | 0.76 | 0.90 | 0.0981 |
| P11142 | Heat shock cognate 71 kDa protein OS=Homo sapiens GN=HSPA8 PE=1 SV=1                         | 0.94 | 0.84 | 0.89 | 0.0344 |
| P21796 | Voltage-dependent anion-selective channel protein 1 OS=Homo sapiens GN=VDAC1 PE=1 SV=2       | 0.81 | 0.93 | 0.87 | 0.0445 |
| Q9Y4L1 | Hypoxia up-regulated protein 1 OS=Homo sapiens GN=HYOU1 PE=1 SV=1                            | 1.05 | 0.69 | 0.87 | 0.1271 |
| Q92841 | Probable ATP-dependent RNA helicase DDX17 OS=Homo sapiens GN=DDX17 PE=1 SV=2                 | 0.82 | 0.91 | 0.87 | 0.0336 |
| O14980 | Exportin-1 OS=Homo sapiens GN=XPO1 PE=1 SV=1                                                 | 0.80 | 0.84 | 0.82 | 0.0166 |
| P33527 | Multidrug resistance-associated protein 1 OS=Homo sapiens GN=ABCC1 PE=1 SV=3                 | 0.91 | 0.70 | 0.81 | 0.0816 |
| P27708 | CAD protein OS=Homo sapiens GN=CAD PE=1 SV=3                                                 | 1.08 | 0.52 | 0.80 | 0.2116 |
| P50990 | T-complex protein 1 subunit theta OS=Homo sapiens GN=CCT8 PE=1 SV=4                          | 0.82 | 0.78 | 0.80 | 0.0176 |
| Q16881 | Thioredoxin reductase 1, cytoplasmic OS=Homo sapiens GN=TXNRD1 PE=1 SV=3                     | 0.91 | 0.66 | 0.78 | 0.0995 |
| Q01813 | ATP-dependent 6-phosphofructokinase, platelet type OS=Homo sapiens GN=PFKP PE=1 SV=2         | 0.76 | 0.75 | 0.75 | 0.0026 |
| P42704 | Leucine-rich PPR motif-containing protein, mitochondrial OS=Homo sapiens GN=LRPPRC PE=1 SV=3 | 0.90 | 0.58 | 0.74 | 0.1354 |
| Q15233 | Non-POU domain-containing octamer-binding protein OS=Homo sapiens GN=NONO PE=1 SV=4          | 0.73 | 0.72 | 0.73 | 0.0010 |
| O43143 | Pre-mRNA-splicing factor ATP-dependent RNA helicase DHX15 OS=Homo sapiens GN=DHX15 PE=1 SV=2 | 0.23 | 1.18 | 0.71 | 0.3754 |
| P17987 | T-complex protein 1 subunit alpha OS=Homo sapiens GN=TCP1 PE=1 SV=1                          | 0.76 | 0.63 | 0.69 | 0.0562 |
| P78527 | DNA-dependent protein kinase catalytic subunit OS=Homo sapiens GN=PRKDC PE=1 SV=3            | 0.71 | 0.62 | 0.67 | 0.0425 |
| Q86VP6 | Cullin-associated NEDD8-dissociated protein 1 OS=Homo sapiens GN=CAND1 PE=1 SV=2             | 0.42 | 0.89 | 0.65 | 0.2198 |
| P14618 | Pyruvate kinase PKM OS=Homo sapiens GN=PKM PE=1 SV=4                                         | 0.71 | 0.57 | 0.64 | 0.0670 |
| P12236 | ADP/ATP translocase 3 OS=Homo sapiens GN=SLC25A6 PE=1 SV=4                                   | 0.21 | 1.07 | 0.64 | 0.3768 |
| O43175 | D-3-phosphoglycerate dehydrogenase OS=Homo sapiens GN=PHGDH PE=1 SV=4                        | 0.33 | 0.93 | 0.63 | 0.2807 |
| P06576 | ATP synthase subunit beta, mitochondrial OS=Homo sapiens GN=ATP5B PE=1 SV=3                  | 0.72 | 0.53 | 0.63 | 0.0932 |

|        |                                                                                                    |      |       |      |        |
|--------|----------------------------------------------------------------------------------------------------|------|-------|------|--------|
| Q92945 | Far upstream element-binding protein 2 OS=Homo sapiens GN=KHSRP PE=1 SV=4                          | 0.65 | 0.58  | 0.61 | 0.0352 |
| Q8WUM4 | Programmed cell death 6-interacting protein OS=Homo sapiens GN=PDCD6IP PE=1 SV=1                   | 0.64 | 0.55  | 0.60 | 0.0464 |
| P06239 | Tyrosine-protein kinase Lck OS=Homo sapiens GN=LCK PE=1 SV=6                                       | 0.65 | 0.53  | 0.59 | 0.0658 |
| P13796 | Plastin-2 OS=Homo sapiens GN=LCP1 PE=1 SV=6                                                        | 0.49 | 0.61  | 0.55 | 0.0656 |
| P49368 | T-complex protein 1 subunit gamma OS=Homo sapiens GN=CCT3 PE=1 SV=4                                | 0.58 | 0.52  | 0.55 | 0.0371 |
| P62736 | Actin, aortic smooth muscle OS=Homo sapiens GN=ACTA2 PE=1 SV=1                                     | 0.59 | 0.50  | 0.55 | 0.0503 |
| P27824 | Calnexin OS=Homo sapiens GN=CANX PE=1 SV=2                                                         | 0.55 | 0.54  | 0.54 | 0.0060 |
| P52272 | Heterogeneous nuclear ribonucleoprotein M OS=Homo sapiens GN=HNRNPM PE=1 SV=3                      | 0.36 | 0.72  | 0.54 | 0.2001 |
| P34932 | Heat shock 70 kDa protein 4 OS=Homo sapiens GN=HSPA4 PE=1 SV=4                                     | 0.50 | 0.58  | 0.54 | 0.0448 |
| P21333 | Filamin-A OS=Homo sapiens GN=FLNA PE=1 SV=4                                                        | 0.54 | 0.46  | 0.50 | 0.0475 |
| Q8TCT9 | Minor histocompatibility antigen H13 OS=Homo sapiens GN=HM13 PE=1 SV=1                             | 0.45 | 0.55  | 0.50 | 0.0617 |
| P68104 | Elongation factor 1-alpha 1 OS=Homo sapiens GN=EEF1A1 PE=1 SV=1                                    | 0.45 | 0.54  | 0.50 | 0.0612 |
| P63104 | 14-3-3 protein zeta/delta OS=Homo sapiens GN=YWHAZ PE=1 SV=1                                       | 0.51 | 0.48  | 0.49 | 0.0217 |
| Q14980 | Nuclear mitotic apparatus protein 1 OS=Homo sapiens GN=NUMA1 PE=1 SV=2                             | 0.16 | 0.77  | 0.47 | 0.3643 |
| B011T2 | Unconventional myosin-Ig OS=Homo sapiens GN=MYO1G PE=1 SV=2                                        | 0.94 | -0.02 | 0.46 | 0.5109 |
| A0FGR8 | Extended synaptotagmin-2 OS=Homo sapiens GN=ESYT2 PE=1 SV=1                                        | 0.57 | 0.35  | 0.46 | 0.1504 |
| P26641 | Elongation factor 1-gamma OS=Homo sapiens GN=EEF1G PE=1 SV=3                                       | 0.77 | 0.15  | 0.46 | 0.3774 |
| P49589 | Cysteine--tRNA ligase, cytoplasmic OS=Homo sapiens GN=CARS PE=1 SV=3                               | 0.16 | 0.75  | 0.45 | 0.3654 |
| P68371 | Tubulin beta-4B chain OS=Homo sapiens GN=TUBB4B PE=1 SV=1                                          | 0.84 | 0.05  | 0.45 | 0.4567 |
| P11021 | 78 kDa glucose-regulated protein OS=Homo sapiens GN=HSPA5 PE=1 SV=2                                | 0.42 | 0.47  | 0.44 | 0.0356 |
| P17858 | ATP-dependent 6-phosphofructokinase, liver type OS=Homo sapiens GN=PFKL PE=1 SV=6                  | 0.40 | 0.48  | 0.44 | 0.0621 |
| O95202 | LETM1 and EF-hand domain-containing protein 1, mitochondrial OS=Homo sapiens GN=LETM1<br>PE=1 SV=1 | 0.35 | 0.53  | 0.44 | 0.1255 |
| P22314 | Ubiquitin-like modifier-activating enzyme 1 OS=Homo sapiens GN=UBA1 PE=1 SV=3                      | 0.44 | 0.44  | 0.44 | 0.0032 |
| O75369 | Filamin-B OS=Homo sapiens GN=FLNB PE=1 SV=2                                                        | 0.50 | 0.37  | 0.44 | 0.0928 |
| Q9NY33 | Dipeptidyl peptidase 3 OS=Homo sapiens GN=DPP3 PE=1 SV=2                                           | 0.80 | 0.07  | 0.44 | 0.4409 |

|        |                                                                                                            |      |       |      |        |
|--------|------------------------------------------------------------------------------------------------------------|------|-------|------|--------|
| P14625 | Endoplasmin OS=Homo sapiens GN=HSP90B1 PE=1 SV=1                                                           | 0.50 | 0.36  | 0.43 | 0.1048 |
| P22626 | Heterogeneous nuclear ribonucleoproteins A2/B1 OS=Homo sapiens GN=HNRNPA2B1 PE=1 SV=2                      | 0.41 | 0.44  | 0.43 | 0.0254 |
| P30101 | Protein disulfide-isomerase A3 OS=Homo sapiens GN=PDIA3 PE=1 SV=4                                          | 0.53 | 0.31  | 0.42 | 0.1618 |
| P60709 | Actin, cytoplasmic 1 OS=Homo sapiens GN=ACTB PE=1 SV=1                                                     | 0.37 | 0.48  | 0.42 | 0.0792 |
| P34897 | Serine hydroxymethyltransferase, mitochondrial OS=Homo sapiens GN=SHMT2 PE=1 SV=3                          | 0.45 | 0.38  | 0.42 | 0.0575 |
| P53618 | Coatomer subunit beta OS=Homo sapiens GN=COPB1 PE=1 SV=3                                                   | 0.67 | 0.12  | 0.40 | 0.3808 |
| O00483 | Cytochrome c oxidase subunit NDUFA4 OS=Homo sapiens GN=NDUFA4 PE=1 SV=1                                    | 0.23 | 0.55  | 0.39 | 0.2462 |
| P06733 | Alpha-enolase OS=Homo sapiens GN=ENO1 PE=1 SV=2                                                            | 0.51 | 0.26  | 0.39 | 0.1972 |
| P39023 | 60S ribosomal protein L3 OS=Homo sapiens GN=RPL3 PE=1 SV=2                                                 | 0.34 | 0.43  | 0.39 | 0.071  |
| P08238 | Heat shock protein HSP 90-beta OS=Homo sapiens GN=HSP90AB1 PE=1 SV=4                                       | 0.45 | 0.22  | 0.33 | 0.2055 |
| P04843 | Dolichyl-diphosphooligosaccharide--protein glycosyltransferase subunit 1 OS=Homo sapiens GN=RPN1 PE=1 SV=1 | 0.45 | 0.22  | 0.33 | 0.2094 |
| O43390 | Heterogeneous nuclear ribonucleoprotein R OS=Homo sapiens GN=HNRNPR PE=1 SV=1                              | 0.40 | 0.26  | 0.33 | 0.1355 |
| Q00839 | Heterogeneous nuclear ribonucleoprotein U OS=Homo sapiens GN=HNRNPU PE=1 SV=6                              | 0.58 | 0.07  | 0.32 | 0.4199 |
| P17252 | Protein kinase C alpha type OS=Homo sapiens GN=PRKCA PE=1 SV=4                                             | 0.56 | 0.09  | 0.32 | 0.3932 |
| P49736 | DNA replication licensing factor MCM2 OS=Homo sapiens GN=MCM2 PE=1 SV=4                                    | 0.83 | -0.20 | 0.31 | 0.6472 |
| P00505 | Aspartate aminotransferase, mitochondrial OS=Homo sapiens GN=GOT2 PE=1 SV=3                                | 0.20 | 0.41  | 0.31 | 0.2056 |
| O75083 | WD repeat-containing protein 1 OS=Homo sapiens GN=WDR1 PE=1 SV=4                                           | 0.14 | 0.46  | 0.30 | 0.3122 |
| P62258 | 14-3-3 protein epsilon OS=Homo sapiens GN=YWHAE PE=1 SV=1                                                  | 0.17 | 0.42  | 0.30 | 0.2485 |
| P60842 | Eukaryotic initiation factor 4A-I OS=Homo sapiens GN=EIF4A1 PE=1 SV=1                                      | 0.18 | 0.39  | 0.29 | 0.2206 |
| O94919 | Endonuclease domain-containing 1 protein OS=Homo sapiens GN=ENDOD1 PE=1 SV=2                               | 0.13 | 0.41  | 0.27 | 0.3027 |
| P13639 | Elongation factor 2 OS=Homo sapiens GN=EEF2 PE=1 SV=4                                                      | 0.12 | 0.40  | 0.26 | 0.3088 |
| P35580 | Myosin-10 OS=Homo sapiens GN=MYH10 PE=1 SV=3                                                               | 0.20 | 0.32  | 0.26 | 0.1464 |
| Q9NQ29 | Putative RNA-binding protein Luc7-like 1 OS=Homo sapiens GN=LUC7L PE=1 SV=1                                | 0.76 | -0.25 | 0.25 | 0.6998 |
| P17844 | Probable ATP-dependent RNA helicase DDX5 OS=Homo sapiens GN=DDX5 PE=1 SV=1                                 | 0.22 | 0.28  | 0.25 | 0.0729 |
| Q12931 | Heat shock protein 75 kDa, mitochondrial OS=Homo sapiens GN=TRAP1 PE=1 SV=3                                | 0.38 | 0.09  | 0.23 | 0.3456 |

|        |                                                                                                                 |       |       |      |        |
|--------|-----------------------------------------------------------------------------------------------------------------|-------|-------|------|--------|
| Q14204 | Cytoplasmic dynein 1 heavy chain 1 OS=Homo sapiens GN=DYNC1H1 PE=1 SV=5                                         | 0.19  | 0.26  | 0.22 | 0.1049 |
| Q15366 | Poly(rC)-binding protein 2 OS=Homo sapiens GN=PCBP2 PE=1 SV=1                                                   | 0.18  | 0.27  | 0.22 | 0.1314 |
| P25705 | ATP synthase subunit alpha, mitochondrial OS=Homo sapiens GN=ATP5A1 PE=1 SV=1                                   | 0.17  | 0.23  | 0.20 | 0.0975 |
| Q06830 | Peroxiredoxin-1 OS=Homo sapiens GN=PRDX1 PE=1 SV=1                                                              | 0.14  | 0.26  | 0.20 | 0.1776 |
| Q9Y490 | Talin-1 OS=Homo sapiens GN=TLN1 PE=1 SV=3                                                                       | 0.37  | 0.03  | 0.20 | 0.4478 |
| Q15084 | Protein disulfide-isomerase A6 OS=Homo sapiens GN=PDIA6 PE=1 SV=1                                               | 0.31  | 0.03  | 0.17 | 0.4277 |
| P69905 | Hemoglobin subunit alpha OS=Homo sapiens GN=HBA1 PE=1 SV=2                                                      | 0.08  | 0.26  | 0.17 | 0.3127 |
| P38646 | Stress-70 protein, mitochondrial OS=Homo sapiens GN=HSPA9 PE=1 SV=2                                             | -0.16 | 0.48  | 0.16 | 0.6953 |
| P40926 | Malate dehydrogenase, mitochondrial OS=Homo sapiens GN=MDH2 PE=1 SV=3                                           | 0.24  | 0.06  | 0.15 | 0.3298 |
| P02768 | Serum albumin OS=Homo sapiens GN=ALB PE=1 SV=2                                                                  | -0.03 | 0.29  | 0.13 | 0.5527 |
| P55060 | Exportin-2 OS=Homo sapiens GN=CSE1L PE=1 SV=3                                                                   | -0.35 | 0.60  | 0.13 | 0.8291 |
| Q63HN8 | E3 ubiquitin-protein ligase RNF213 OS=Homo sapiens GN=RNF213 PE=1 SV=3                                          | 0.71  | -0.46 | 0.12 | 0.8613 |
| Q8TCJ2 | Dolichyl-diphosphooligosaccharide--protein glycosyltransferase subunit STT3B OS=Homo sapiens GN=STT3B PE=1 SV=1 | 0.36  | -0.11 | 0.12 | 0.6822 |
| Q14697 | Neutral alpha-glucosidase AB OS=Homo sapiens GN=GANAB PE=1 SV=3                                                 | -0.10 | 0.35  | 0.12 | 0.6678 |
| Q14974 | Importin subunit beta-1 OS=Homo sapiens GN=KPNB1 PE=1 SV=2                                                      | -0.01 | 0.21  | 0.10 | 0.5107 |
| O60831 | PRA1 family protein 2 OS=Homo sapiens GN=PRAF2 PE=1 SV=1                                                        | 0.42  | -0.24 | 0.09 | 0.8208 |
| P46782 | 40S ribosomal protein S5 OS=Homo sapiens GN=RPS5 PE=1 SV=4                                                      | 0.07  | 0.09  | 0.08 | 0.0632 |
| P55072 | Transitional endoplasmic reticulum ATPase OS=Homo sapiens GN=VCP PE=1 SV=4                                      | -0.04 | 0.20  | 0.08 | 0.6188 |
| P48735 | Isocitrate dehydrogenase [NADP], mitochondrial OS=Homo sapiens GN=IDH2 PE=1 SV=2                                | -0.11 | 0.26  | 0.07 | 0.7385 |
| Q99832 | T-complex protein 1 subunit eta OS=Homo sapiens GN=CCT7 PE=1 SV=2                                               | -0.03 | 0.17  | 0.07 | 0.5788 |
| P50991 | T-complex protein 1 subunit delta OS=Homo sapiens GN=CCT4 PE=1 SV=4                                             | 0.26  | -0.12 | 0.07 | 0.7539 |
| P78417 | Glutathione S-transferase omega-1 OS=Homo sapiens GN=GSTO1 PE=1 SV=2                                            | 0.18  | -0.05 | 0.07 | 0.6556 |
| P00338 | L-lactate dehydrogenase A chain OS=Homo sapiens GN=LDHA PE=1 SV=2                                               | 0.15  | -0.02 | 0.06 | 0.5822 |
| Q00534 | Cyclin-dependent kinase 6 OS=Homo sapiens GN=CDK6 PE=1 SV=1                                                     | -0.97 | 1.08  | 0.06 | 0.962  |
| P14324 | Farnesyl pyrophosphate synthase OS=Homo sapiens GN=FDPS PE=1 SV=4                                               | -0.18 | 0.27  | 0.05 | 0.8604 |



|        |                                                                                         |       |       |       |        |
|--------|-----------------------------------------------------------------------------------------|-------|-------|-------|--------|
| P31948 | Stress-induced-phosphoprotein 1 OS=Homo sapiens GN=STIP1 PE=1 SV=1                      | 0.21  | -0.16 | 0.02  | 0.8986 |
| P23284 | Peptidyl-prolyl cis-trans isomerase B OS=Homo sapiens GN=PPIB PE=1 SV=2                 | 0.12  | -0.08 | 0.02  | 0.8358 |
| Q00610 | Clathrin heavy chain 1 OS=Homo sapiens GN=CLTC PE=1 SV=5                                | 0.26  | -0.21 | 0.02  | 0.9282 |
| Q6P2Q9 | Pre-mRNA-processing-splicing factor 8 OS=Homo sapiens GN=PRPF8 PE=1 SV=2                | -0.07 | 0.10  | 0.02  | 0.8437 |
| A0AVT1 | Ubiquitin-like modifier-activating enzyme 6 OS=Homo sapiens GN=UBA6 PE=1 SV=1           | -0.44 | 0.47  | 0.01  | 0.9738 |
| P62701 | 40S ribosomal protein S4, X isoform OS=Homo sapiens GN=RPS4X PE=1 SV=2                  | -0.28 | 0.30  | 0.01  | 0.9708 |
| P31146 | Coronin-1A OS=Homo sapiens GN=CORO1A PE=1 SV=4                                          | -0.07 | 0.03  | -0.02 | 0.8084 |
| P40227 | T-complex protein 1 subunit zeta OS=Homo sapiens GN=CCT6A PE=1 SV=3                     | 0.22  | -0.27 | -0.02 | 0.9520 |
| P07195 | L-lactate dehydrogenase B chain OS=Homo sapiens GN=LDHB PE=1 SV=2                       | -0.02 | -0.04 | -0.03 | 0.1705 |
| P30044 | Peroxiredoxin-5, mitochondrial OS=Homo sapiens GN=PRDX5 PE=1 SV=4                       | 0     | -0.07 | -0.03 | 0.5698 |
|        | U5 small nuclear ribonucleoprotein 200 kDa helicase OS=Homo sapiens GN=SNRNP200 PE=1    |       |       |       |        |
| O75643 | SV=2                                                                                    | 0.04  | -0.11 | -0.04 | 0.7352 |
| P36578 | 60S ribosomal protein L4 OS=Homo sapiens GN=RPL4 PE=1 SV=5                              | -0.04 | -0.07 | -0.06 | 0.1847 |
| P16615 | Sarcoplasmic/endoplasmic reticulum calcium ATPase 2 OS=Homo sapiens GN=ATP2A2 PE=1 SV=1 | 0.07  | -0.19 | -0.06 | 0.7476 |
| P46940 | RasGTPase-activating-like protein IQGAP1 OS=Homo sapiens GN=IQGAP1 PE=1 SV=1            | -0.16 | 0.03  | -0.06 | 0.6565 |
| P52209 | 6-phosphogluconate dehydrogenase, decarboxylating OS=Homo sapiens GN=PGD PE=1 SV=3      | 0     | -0.13 | -0.07 | 0.4999 |
| P31939 | Bifunctional purine biosynthesis protein PURH OS=Homo sapiens GN=ATIC PE=1 SV=3         | -0.17 | 0.03  | -0.07 | 0.6148 |
| P11717 | Cation-independent mannose-6-phosphate receptor OS=Homo sapiens GN=IGF2R PE=1 SV=3      | -0.07 | -0.11 | -0.09 | 0.1612 |
|        | Sodium/potassium-transporting ATPase subunit alpha-3 OS=Homo sapiens GN=ATP1A3 PE=1     |       |       |       |        |
| P13637 | SV=3                                                                                    | -0.67 | 0.46  | -0.11 | 0.8879 |
| P68871 | Hemoglobin subunit beta OS=Homo sapiens GN=HBB PE=1 SV=2                                | -0.02 | -0.21 | -0.11 | 0.4534 |
| P08133 | Annexin A6 OS=Homo sapiens GN=ANXA6 PE=1 SV=3                                           | -0.12 | -0.12 | -0.12 | 0.0076 |
| P49257 | Protein ERGIC-53 OS=Homo sapiens GN=LMAN1 PE=1 SV=2                                     | 0     | -0.28 | -0.14 | 0.5212 |
| P11586 | C-1-tetrahydrofolate synthase, cytoplasmic OS=Homo sapiens GN=MTHFD1 PE=1 SV=3          | -0.17 | -0.13 | -0.15 | 0.0995 |
| P13010 | X-ray repair cross-complementing protein 5 OS=Homo sapiens GN=XRCC5 PE=1 SV=3           | -0.21 | -0.09 | -0.15 | 0.2522 |
| Q08211 | ATP-dependent RNA helicase A OS=Homo sapiens GN=DHX9 PE=1 SV=4                          | -0.26 | -0.04 | -0.15 | 0.4107 |

|        |                                                                                          |       |       |       |        |
|--------|------------------------------------------------------------------------------------------|-------|-------|-------|--------|
| P04075 | Fructose-bisphosphate aldolase A OS=Homo sapiens GN=ALDOA PE=1 SV=2                      | -0.01 | -0.35 | -0.18 | 0.4828 |
| P25789 | Proteasome subunit alpha type-4 OS=Homo sapiens GN=PSMA4 PE=1 SV=1                       | -0.16 | -0.24 | -0.20 | 0.1274 |
| P61981 | 14-3-3 protein gamma OS=Homo sapiens GN=YWHAG PE=1 SV=2                                  | -0.28 | -0.13 | -0.21 | 0.2272 |
| P12956 | X-ray repair cross-complementing protein 6 OS=Homo sapiens GN=XRCC6 PE=1 SV=2            | -0.21 | -0.22 | -0.22 | 0.0203 |
| Q9H9B4 | Sideroflexin-1 OS=Homo sapiens GN=SFXN1 PE=1 SV=4                                        | -0.43 | -0.03 | -0.23 | 0.4670 |
| P15153 | Ras-related C3 botulinum toxin substrate 2 OS=Homo sapiens GN=RAC2 PE=1 SV=1             | -0.21 | -0.25 | -0.23 | 0.0585 |
| P62937 | Peptidyl-prolyl cis-trans isomerase A OS=Homo sapiens GN=PPIA PE=1 SV=2                  | -0.19 | -0.28 | -0.23 | 0.1186 |
| P26038 | Moesin OS=Homo sapiens GN=MSN PE=1 SV=3                                                  | -0.19 | -0.27 | -0.23 | 0.1134 |
| P00558 | Phosphoglycerate kinase 1 OS=Homo sapiens GN=PGK1 PE=1 SV=3                              | -0.22 | -0.26 | -0.24 | 0.0551 |
| P60953 | Cell division control protein 42 homolog OS=Homo sapiens GN=CDC42 PE=1 SV=2              | -0.11 | -0.37 | -0.24 | 0.3281 |
| P52566 | Rho GDP-dissociation inhibitor 2 OS=Homo sapiens GN=ARHGDI2 PE=1 SV=3                    | -0.27 | -0.22 | -0.24 | 0.0747 |
| P07900 | Heat shock protein HSP 90-alpha OS=Homo sapiens GN=HSP90AA1 PE=1 SV=5                    | -0.19 | -0.3  | -0.25 | 0.1345 |
| P02786 | Transferrin receptor protein 1 OS=Homo sapiens GN=TFRC PE=1 SV=2                         | -0.34 | -0.17 | -0.25 | 0.2026 |
| Q9BRX8 | Redox-regulatory protein FAM213A OS=Homo sapiens GN=FAM213A PE=1 SV=3                    | -0.52 | 0     | -0.26 | 0.4999 |
| Q14152 | Eukaryotic translation initiation factor 3 subunit A OS=Homo sapiens GN=EIF3A PE=1 SV=1  | -0.40 | -0.16 | -0.28 | 0.2675 |
| P00813 | Adenosine deaminase OS=Homo sapiens GN=ADA PE=1 SV=3                                     | -0.46 | -0.12 | -0.29 | 0.3454 |
| P08195 | 4F2 cell-surface antigen heavy chain OS=Homo sapiens GN=SLC3A2 PE=1 SV=3                 | -0.17 | -0.41 | -0.29 | 0.2449 |
| P62826 | GTP-binding nuclear protein Ran OS=Homo sapiens GN=RAN PE=1 SV=3                         | -0.12 | -0.50 | -0.31 | 0.3585 |
| P78371 | T-complex protein 1 subunit beta OS=Homo sapiens GN=CCT2 PE=1 SV=4                       | -0.38 | -0.26 | -0.32 | 0.1229 |
| Q7KZF4 | Staphylococcal nuclease domain-containing protein 1 OS=Homo sapiens GN=SND1 PE=1 SV=1    | -0.36 | -0.29 | -0.33 | 0.0720 |
| Q13813 | Spectrin alpha chain, non-erythrocytic 1 OS=Homo sapiens GN=SPTAN1 PE=1 SV=3             | -0.24 | -0.42 | -0.33 | 0.1685 |
| P23396 | 40S ribosomal protein S3 OS=Homo sapiens GN=RPS3 PE=1 SV=2                               | -0.32 | -0.35 | -0.34 | 0.0329 |
| P41252 | Isoleucine--tRNA ligase, cytoplasmic OS=Homo sapiens GN=IARS PE=1 SV=2                   | -0.07 | -0.62 | -0.34 | 0.4302 |
| Q99536 | Synaptic vesicle membrane protein VAT-1 homolog OS=Homo sapiens GN=VAT1 PE=1 SV=2        | -0.23 | -0.52 | -0.37 | 0.2407 |
| P05023 | Sodium/potassium-transporting ATPase subunit alpha-1 OS=Homo sapiens GN=ATP1A1 PE=1 SV=1 | -0.29 | -0.46 | -0.38 | 0.1398 |

|        |                                                                                   |       |       |       |        |
|--------|-----------------------------------------------------------------------------------|-------|-------|-------|--------|
| P63000 | Ras-related C3 botulinum toxin substrate 1 OS=Homo sapiens GN=RAC1 PE=1 SV=1      | -0.11 | -0.65 | -0.38 | 0.3986 |
| P12235 | ADP/ATP translocase 1 OS=Homo sapiens GN=SLC25A4 PE=1 SV=4                        | -0.77 | -0.02 | -0.39 | 0.4894 |
| Q9NQC3 | Reticulon-4 OS=Homo sapiens GN=RTN4 PE=1 SV=2                                     | -0.29 | -0.51 | -0.4  | 0.1756 |
| Q01518 | Adenylyl cyclase-associated protein 1 OS=Homo sapiens GN=CAP1 PE=1 SV=5           | -0.48 | -0.34 | -0.41 | 0.1055 |
| P08575 | Receptor-type tyrosine-protein phosphatase C OS=Homo sapiens GN=PTPRC PE=1 SV=2   | -0.44 | -0.42 | -0.43 | 0.0085 |
| P09622 | Dihydrolipoyl dehydrogenase, mitochondrial OS=Homo sapiens GN=DLD PE=1 SV=2       | -0.21 | -0.68 | -0.45 | 0.3138 |
| P29401 | Transketolase OS=Homo sapiens GN=TKT PE=1 SV=3                                    | -0.54 | -0.41 | -0.47 | 0.0832 |
| P54136 | Arginine--tRNA ligase, cytoplasmic OS=Homo sapiens GN=RARS PE=1 SV=2              | -0.39 | -0.58 | -0.48 | 0.1216 |
| P08621 | U1 small nuclear ribonucleoprotein 70 kDa OS=Homo sapiens GN=SNRNP70 PE=1 SV=2    | -0.37 | -0.60 | -0.49 | 0.1517 |
| P62851 | 40S ribosomal protein S25 OS=Homo sapiens GN=RPS25 PE=1 SV=1                      | -0.31 | -0.67 | -0.49 | 0.2260 |
| P22392 | Nucleoside diphosphate kinase B OS=Homo sapiens GN=NME2 PE=1 SV=1                 | -0.53 | -0.49 | -0.51 | 0.0290 |
| P04406 | Glyceraldehyde-3-phosphate dehydrogenase OS=Homo sapiens GN=GAPDH PE=1 SV=3       | -0.61 | -0.42 | -0.52 | 0.1181 |
| Q9NYU2 | UDP-glucose:glycoprotein glucosyltransferase 1 OS=Homo sapiens GN=UGGT1 PE=1 SV=3 | -0.47 | -0.65 | -0.56 | 0.1023 |
| P19338 | Nucleolin OS=Homo sapiens GN=NCL PE=1 SV=3                                        | -0.51 | -0.67 | -0.59 | 0.0881 |
| P62280 | 40S ribosomal protein S11 OS=Homo sapiens GN=RPS11 PE=1 SV=3                      | -0.76 | -0.52 | -0.64 | 0.1196 |
| P62906 | 60S ribosomal protein L10a OS=Homo sapiens GN=RPL10A PE=1 SV=2                    | -0.51 | -0.79 | -0.65 | 0.1363 |
| P07737 | Profilin-1 OS=Homo sapiens GN=PFN1 PE=1 SV=2                                      | -0.67 | -0.74 | -0.71 | 0.0287 |
| O75390 | Citrate synthase, mitochondrial OS=Homo sapiens GN=CS PE=1 SV=2                   | -0.62 | -0.80 | -0.71 | 0.0832 |
| P15311 | Ezrin OS=Homo sapiens GN=EZR PE=1 SV=4                                            | -1.17 | -0.25 | -0.71 | 0.3666 |
| Q96GQ5 | RUS1 family protein C16orf58 OS=Homo sapiens GN=C16orf58 PE=1 SV=2                | -0.97 | -0.48 | -0.73 | 0.2101 |
| Q16629 | Serine/arginine-rich splicing factor 7 OS=Homo sapiens GN=SRSF7 PE=1 SV=1         | -0.73 | -0.79 | -0.76 | 0.0245 |
| Q5T4S7 | E3 ubiquitin-protein ligase UBR4 OS=Homo sapiens GN=UBR4 PE=1 SV=1                | -0.62 | -0.94 | -0.78 | 0.1290 |
| P39019 | 40S ribosomal protein S19 OS=Homo sapiens GN=RPS19 PE=1 SV=2                      | -0.79 | -0.84 | -0.82 | 0.0200 |
| P61604 | 10 kDa heat shock protein, mitochondrial OS=Homo sapiens GN=HSPE1 PE=1 SV=2       | -0.84 | -0.83 | -0.83 | 0.0029 |
| P62424 | 60S ribosomal protein L7a OS=Homo sapiens GN=RPL7A PE=1 SV=2                      | -0.73 | -0.95 | -0.84 | 0.0844 |
| P06702 | Protein S100-A9 OS=Homo sapiens GN=S100A9 PE=1 SV=1                               | -0.59 | -1.12 | -0.86 | 0.1929 |

|        |                                                                                                    |       |       |       |        |
|--------|----------------------------------------------------------------------------------------------------|-------|-------|-------|--------|
| P15880 | 40S ribosomal protein S2 OS=Homo sapiens GN=RPS2 PE=1 SV=2                                         | -0.95 | -0.84 | -0.90 | 0.0408 |
| P05165 | Propionyl-CoA carboxylase alpha chain, mitochondrial OS=Homo sapiens GN=PCCA PE=1 SV=4             | -0.85 | -1.00 | -0.92 | 0.0507 |
| P81605 | Dermcidin OS=Homo sapiens GN=DCD PE=1 SV=2                                                         | -0.83 | -1.02 | -0.93 | 0.0665 |
| P18621 | 60S ribosomal protein L17 OS=Homo sapiens GN=RPL17 PE=1 SV=3                                       | -0.95 | -0.91 | -0.93 | 0.0164 |
| Q01130 | Serine/arginine-rich splicing factor 2 OS=Homo sapiens GN=SRSF2 PE=1 SV=4                          | -1.06 | -0.91 | -0.98 | 0.0479 |
| P18124 | 60S ribosomal protein L7 OS=Homo sapiens GN=RPL7 PE=1 SV=1                                         | -1.00 | -1.00 | -1.00 | 0.0004 |
| P04908 | Histone H2A type 1-B/E OS=Homo sapiens GN=HIST1H2AB PE=1 SV=2                                      | -1.76 | -0.28 | -1.02 | 0.4002 |
| P62750 | 60S ribosomal protein L23a OS=Homo sapiens GN=RPL23A PE=1 SV=1                                     | -0.88 | -1.24 | -1.06 | 0.1078 |
| P40429 | 60S ribosomal protein L13a OS=Homo sapiens GN=RPL13A PE=1 SV=2                                     | -1.13 | -1.06 | -1.10 | 0.0202 |
| Q07020 | 60S ribosomal protein L18 OS=Homo sapiens GN=RPL18 PE=1 SV=2                                       | -1.03 | -1.18 | -1.10 | 0.0434 |
| P11498 | Pyruvate carboxylase, mitochondrial OS=Homo sapiens GN=PC PE=1 SV=2                                | -0.97 | -1.27 | -1.12 | 0.0869 |
| Q01082 | Spectrin beta chain, non-erythrocytic 1 OS=Homo sapiens GN=SPTBN1 PE=1 SV=2                        | -1.00 | -1.32 | -1.16 | 0.0899 |
| P27635 | 60S ribosomal protein L10 OS=Homo sapiens GN=RPL10 PE=1 SV=4                                       | -1.16 | -1.19 | -1.17 | 0.0087 |
| Q96RQ3 | Methylcrotonoyl-CoA carboxylase subunit alpha, mitochondrial OS=Homo sapiens GN=MCCC1<br>PE=1 SV=3 | -1.34 | -1.06 | -1.20 | 0.0731 |
| Q9Y383 | Putative RNA-binding protein Luc7-like 2 OS=Homo sapiens GN=LUC7L2 PE=1 SV=2                       | -1.16 | -1.29 | -1.22 | 0.0344 |
| P62917 | 60S ribosomal protein L8 OS=Homo sapiens GN=RPL8 PE=1 SV=2                                         | -1.28 | -1.23 | -1.26 | 0.0126 |
| Q02878 | 60S ribosomal protein L6 OS=Homo sapiens GN=RPL6 PE=1 SV=3                                         | -1.16 | -1.40 | -1.28 | 0.0606 |
| Q02978 | Mitochondrial 2-oxoglutarate/malate carrier protein OS=Homo sapiens GN=SLC25A11 PE=1 SV=3          | -1.28 | -1.38 | -1.33 | 0.0236 |
| P62753 | 40S ribosomal protein S6 OS=Homo sapiens GN=RPS6 PE=1 SV=1                                         | -1.41 | -1.40 | -1.41 | 0.0024 |
| P84098 | 60S ribosomal protein L19 OS=Homo sapiens GN=RPL19 PE=1 SV=1                                       | -1.23 | -1.62 | -1.42 | 0.0863 |
| P62241 | 40S ribosomal protein S8 OS=Homo sapiens GN=RPS8 PE=1 SV=2                                         | -1.38 | -1.52 | -1.45 | 0.0308 |
| P62910 | 60S ribosomal protein L32 OS=Homo sapiens GN=RPL32 PE=1 SV=2                                       | -1.49 | -1.48 | -1.48 | 0.0027 |
| P50416 | Carnitine O-palmitoyltransferase 1, liver isoform OS=Homo sapiens GN=CPT1A PE=1 SV=2               | -1.49 | -1.60 | -1.54 | 0.0229 |
| P47914 | 60S ribosomal protein L29 OS=Homo sapiens GN=RPL29 PE=1 SV=2                                       | -1.60 | -1.58 | -1.59 | 0.0046 |
| P16401 | Histone H1.5 OS=Homo sapiens GN=HIST1H1B PE=1 SV=3                                                 | -1.67 | -1.58 | -1.63 | 0.0177 |

|        |                                                                                      |       |       |       |        |
|--------|--------------------------------------------------------------------------------------|-------|-------|-------|--------|
| P46778 | 60S ribosomal protein L21 OS=Homo sapiens GN=RPL21 PE=1 SV=2                         | -1.52 | -1.76 | -1.64 | 0.0462 |
| P46781 | 40S ribosomal protein S9 OS=Homo sapiens GN=RPS9 PE=1 SV=3                           | -1.74 | -1.56 | -1.65 | 0.0335 |
| P46779 | 60S ribosomal protein L28 OS=Homo sapiens GN=RPL28 PE=1 SV=3                         | -1.58 | -1.79 | -1.68 | 0.0395 |
| P61313 | 60S ribosomal protein L15 OS=Homo sapiens GN=RPL15 PE=1 SV=2                         | -1.74 | -1.63 | -1.68 | 0.0210 |
| Q13085 | Acetyl-CoA carboxylase 1 OS=Homo sapiens GN=ACACA PE=1 SV=2                          | -1.66 | -1.76 | -1.71 | 0.0182 |
| Q9Y3U8 | 60S ribosomal protein L36 OS=Homo sapiens GN=RPL36 PE=1 SV=3                         | -1.65 | -1.89 | -1.77 | 0.0429 |
| P68431 | Histone H3.1 OS=Homo sapiens GN=HIST1H3A PE=1 SV=2                                   | -1.73 | -1.87 | -1.80 | 0.0247 |
| Q02543 | 60S ribosomal protein L18a OS=Homo sapiens GN=RPL18A PE=1 SV=2                       | -1.97 | -1.68 | -1.82 | 0.0510 |
| P62805 | Histone H4 OS=Homo sapiens GN=HIST1H4A PE=1 SV=2                                     | -2.00 | -1.80 | -1.90 | 0.0329 |
| P26373 | 60S ribosomal protein L13 OS=Homo sapiens GN=RPL13 PE=1 SV=4                         | -1.77 | -2.03 | -1.90 | 0.0437 |
| P61927 | 60S ribosomal protein L37 OS=Homo sapiens GN=RPL37 PE=1 SV=2                         | -1.84 | -1.98 | -1.91 | 0.0238 |
| P16403 | Histone H1.2 OS=Homo sapiens GN=HIST1H1C PE=1 SV=2                                   | -2.16 | -1.68 | -1.92 | 0.0790 |
| P51572 | B-cell receptor-associated protein 31 OS=Homo sapiens GN=BCAP31 PE=1 SV=3            | -1.95 | -2.03 | -1.99 | 0.0124 |
| P10412 | Histone H1.4 OS=Homo sapiens GN=HIST1H1E PE=1 SV=2                                   | -1.95 | -2.04 | -2.00 | 0.0150 |
| P62899 | 60S ribosomal protein L31 OS=Homo sapiens GN=RPL31 PE=1 SV=1                         | -1.85 | -2.17 | -2.01 | 0.0506 |
| P42766 | 60S ribosomal protein L35 OS=Homo sapiens GN=RPL35 PE=1 SV=2                         | -1.92 | -2.11 | -2.01 | 0.0297 |
| P40939 | Trifunctional enzyme subunit alpha, mitochondrial OS=Homo sapiens GN=HADHA PE=1 SV=2 | -1.87 | -2.45 | -2.16 | 0.0861 |
| P49207 | 60S ribosomal protein L34 OS=Homo sapiens GN=RPL34 PE=1 SV=3                         | -2.81 | -2.66 | -2.73 | 0.0175 |

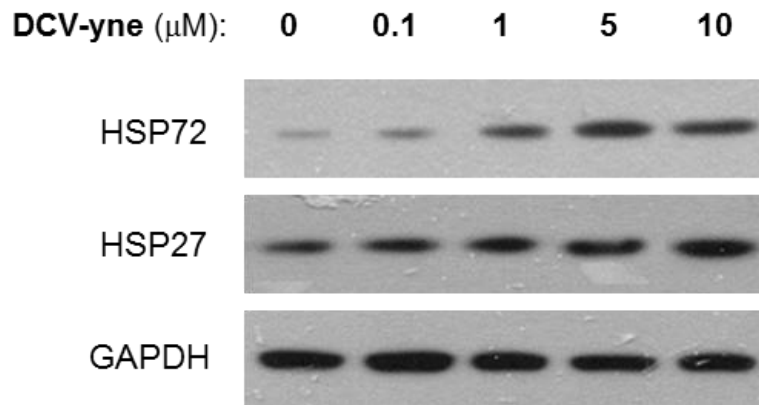

**Supplementary Fig. S1** Induction of endogenous heat shock proteins by DCV-yne in Jurkat. Jurkat cells were treated with various concentrations of DCV-yne in culture medium for 24 h.

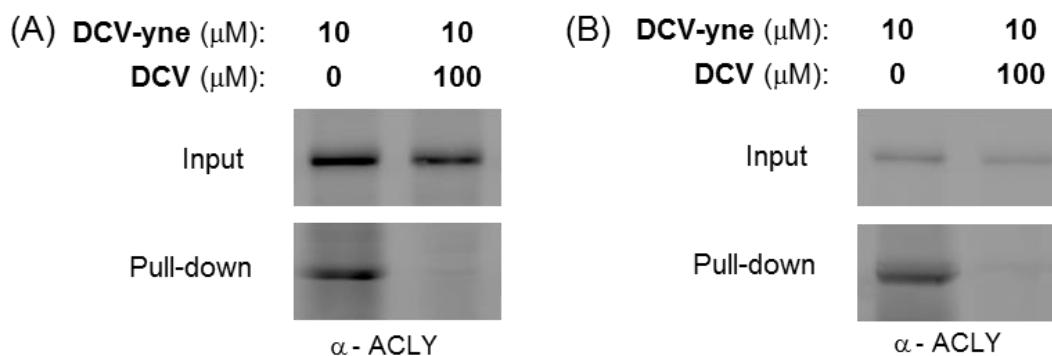

**Supplementary Fig. S2** Pull-down/Western blot validation: (A) HeLa and (B) HCT116 cells were treated with DCV-yne (10  $\mu\text{M}$ , 2 h) with or without DCV (100  $\mu\text{M}$ , 1 h) preincubation as indicated. Cells were lysed and subjected to click reaction with biotin- $\text{N}_3$  and pulled-down with streptavidin beads. Bound proteins were eluted by boiling in loading buffer, separated by SDS-PAGE, transferred to membrane, and visualized by ACLY antibody.

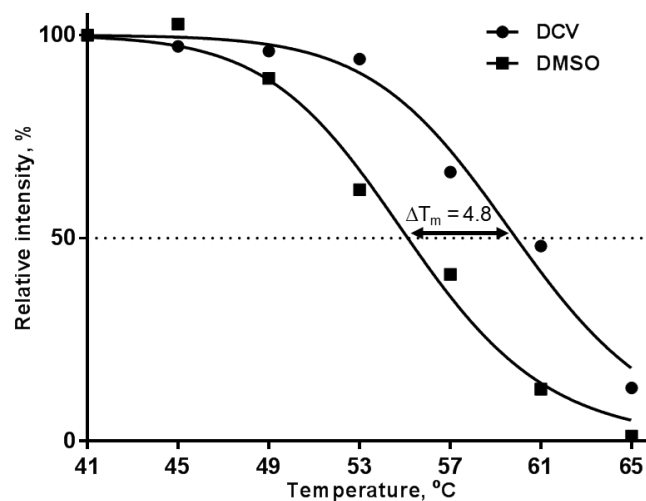

**Supplementary Fig. S3** Cellular thermal-shift assay (CETSA) revealed the stabilization of ACLY upon DCV treatment: The band intensity (Fig. 2E) of soluble ACLY at 41 °C is set at 100%; the band intensities (Fig. 2E) of the remaining soluble ACLY at different temperatures were measured, and the data were fitted to obtain apparent  $\Delta T_m$  values using the Boltzmann Sigmoid equation within GraphPad Prism 7.0.

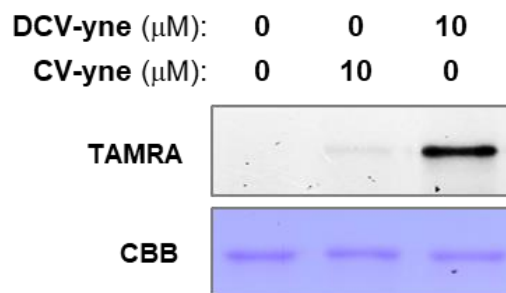

**Supplementary Fig. S4** The negative probe CV-yne cannot label recombinant ACLY: Recombinant ACLY protein was incubated with DCV-yne, CV-yne, or DMSO as indicated at room temperature for 1 h, followed by click reaction with TAMRA- $\text{N}_3$  and in gel fluorescence.

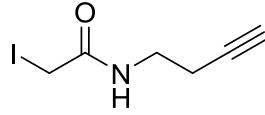

**IA-yne**

**Supplementary Fig. S5** The structure of IA-yne which used in competitive labeling experiment of Fig. 3C.

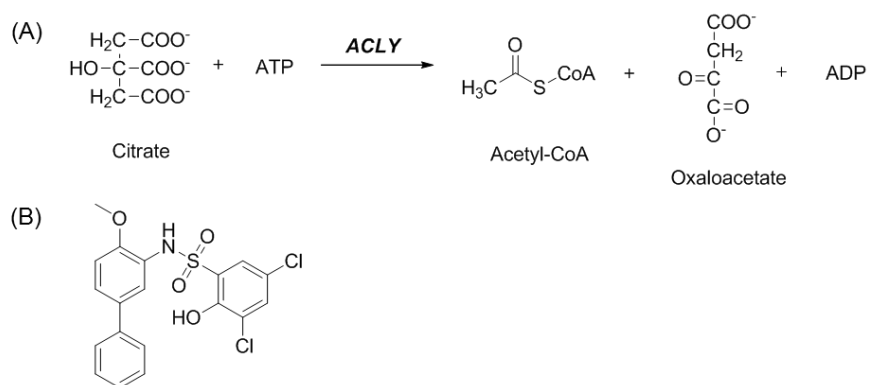

**Supplementary Fig. S6** (A) The reaction catalyzed by ACLY protein. (B) The structure of known ACLY inhibitor BMS-303141.

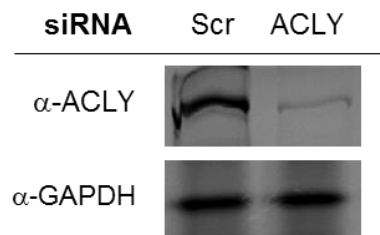

**Supplementary Fig. S7** Validation of siRNA-mediated ACLY knockdown by western blot



## 2. Biological Experiments

### 2.1 Cell proliferation assay

All cell lines (Jurkat, K562, HeLa, HCT116, and CHO) were ordered from Shanghai Institutes for Biological Sciences, Chinese Academy of Sciences (Shanghai, China). Human PBMCs were obtained from the Blood Center of Shanghai, China. CD4 T cells were purified from PBMCs by use of anti-CD4-specific antibody-coated microbeads (Miltenyi Biotec) as described previously.<sup>1</sup>

Jurkat, K562, and CD4 cells were grown in RPMI medium (Gibco) supplemented with 1% L-Glutamine, 1% Penicillin-Streptomycin and 10% Fetal Bovine Serum (FBS, Gibco). HeLa, HCT116, and CHO cells were grown in DMEM (Gibco) supplemented with 1% L-Glutamine, 1% Penicillin-Streptomycin and 10% Fetal Bovine Serum (FBS, Gibco). The culture incubator set is 37°C with 5% CO<sub>2</sub>. Cells cultured for three passages were diluted in culture medium to 1×10<sup>6</sup> cells per mL. 100 μL of cell suspension were seeded to each well (10000 cells/well) of 96-well plate and incubated at 37 °C overnight. Cells in 96-well plate were treated with various concentrations of compounds and DMSO (negative control) for 48 h in a 37 °C incubator. Cell viability was assessed by CellTiter-Glo<sup>®</sup> Luminescent Kit (Promega). Data analysis was performed with GraphPad Prism 7.0.

### 2.2 Western blot

The primary antibodies of Hsp27 and Hsp72 were purchased from Santa Cruz, USA. The primary antibodies of ACLY and GAPDH were purchased from Sangon Biotech, Shanghai. After SDS-PAGE, the proteins were transferred onto nitrocellulose membrane (Millipore) and the membrane was blocked with 3% (w/v) BSA in tris-buffered saline (TBS) for 2 h at room temperature. After blocking, membranes were incubated with primary antibody at room temperature for 1 h. After washing with TBST (TBS containing 0.1% Tween-20) three times, blots were further incubated with the HRP-conjugated anti-rabbit (Sangon Biotech) secondary antibody for 1 h at room temperature. After incubation, the blot was washed again with TBST three times and developed by enhanced ECL chemiluminescent substrate kit (Pierce).

### 2.3 Gel-based probes labeling of living Jurkat cells

Jurkat cells grown in culture medium were incubated with DCV-yne or CV-yne as indicated for 3 h. After harvesting, cell pellets were sonicated and homogenized in cold lysis buffer (50 mM HEPES pH 8.0, 150 mM NaCl, 0.1 mM EDTA, 0.1% Triton X-100 and complete protease inhibitors) for 30 minutes. The lysed cells were centrifuged at 14000 g for 5 minutes and the soluble fractions were collected as whole cellular proteomes. The samples were diluted to 2 mg/mL with lysis buffer and 1% SDS (w/v) was added to each sample and click reaction was performed as below: for each reaction, 20 μL of protein samples were added to freshly prepared 0.2μL each of TAMRA-N<sub>3</sub> (10 mM in DMSO,

Lumiprobe), CuSO<sub>4</sub> (100 mM in H<sub>2</sub>O), THPTA (Tris(3-hydroxypropyltriazolylmethyl)amine, 10 mM in H<sub>2</sub>O, Sigma) and sodium ascorbate (NaVc, 100 mM in H<sub>2</sub>O). The samples were incubated at room temperature for 1 h, added with SDS-PAGE sample loading buffer (5×, 4 μL), applied to SDS-PAGE and imaged by Pharos-FX imaging system (Bio-rad).

## 2.4 Chemoproteomic profiling of Jurkat cells with DCV probes

The probe incubation and proteome preparation procedures were same as that of labeling studies mentioned above in section 2.2, ESI. Each of 500 μL of proteome sample was subjected to click reaction with Biotin-N<sub>3</sub> (500 μM, Biomatrix Inc.), CuSO<sub>4</sub> (1 mM), THPTA (100 μM) and NaVc (1 mM). The samples were precipitated with CH<sub>3</sub>OH (600 μL) / CHCl<sub>3</sub> (150 μL) / H<sub>2</sub>O (300 μL) sequentially and vortexed for a while. After centrifuge at 14,000 g for 3 minutes, the protein disk was washed twice with CH<sub>3</sub>OH (500 μL), air-dried and re-dissolved in 200 μL of click buffer (50 mM HEPES pH 8.0, 1% SDS) by sonication. 50 μL of streptavidin-sepharose (GE Healthcare) beads were added to each sample and incubated at room temperature with continuous rotation for 2 h. The beads were washed with PBS with 1% SDS (w/v) three times, PBS with 0.5 M NaCl three times, 4 M urea in 100 mM triethylammonium bicarbonate (TEAB, Thermo Scientific) twice, and 100 mM TEAB five times. Each wash was performed on a rotator for 15 minutes. The bounded proteins were subjected to on-beads reductive alkylation with 200 μL of 10 mM of tris(2-carboxyethyl)phosphine (TCEP, Pierce) at 56 °C for 30 minutes and 200 μL of 55 mM iodoacetamide (Sigma) at 37 °C in dark for another 30 minutes, followed by wash with 100 mM TEAB three times. Bounded proteins on beads were digested with 1 μg of sequencing grade modified trypsin (Promega) reconstituted in 50 μL of 100 mM TEAB overnight at 37 °C. The digests were labeled with respective tandem mass tagging (TMT-<sup>2</sup>plex) Isobaric Label Reagent (Thermo Scientific) according to the manufacturer's procedures. The digested CV-yne pull-down sample (negative group) was labeled with TMT reagent 126, the digested DCV-yne pull-down sample (positive group) was labeled with reagent 127. Combined peptides were desalted by C18 spin columns (Pierce) and evaporated to dryness on a SpeedVac. Dried peptides were suspended in 15 μL of ddH<sub>2</sub>O containing 0.1% formic acid with sonication. The proteomics experiment was carried out in biological duplicates.

## 2.5 LC-MS/MS

After filtration through 22 μm membrane the clear solution was subjected to nano LC-MS/MS separation. A volume of 1 μL of each sample was desalted by loading on a Thermo C18 PepMap100 precolumn (300 μm × 5 mm) and eluted on a Thermo Acclaim PepMap RSLC analytical column (75 μm × 15 cm). Mobile phase A (0.1% formic acid in H<sub>2</sub>O) and mobile phase B (0.1% formic acid in acetonitrile) were used to establish the 120min gradient comprised of 85 min of 4–30% B, 15 min of 30–50% B, and 5 min of 90% B, followed by re-equilibrating at 4% B for 15 min. The flow rate was 0.3 μL/min. Peptides were then analyzed on a Q-Exactive proteomic mass spectrometer (Thermo Scientific) in a data-dependent manner, with automatic switching between MS and MS/MS scans

using a top 10 method. MS spectra were acquired at a resolution of 70000 with a target value of  $3 \times 10^6$  ions or a maximum integration time of 50 ms. The scan range was limited from 375 to 1400  $m/z$ . Peptide fragmentation was performed via higher-energy collision dissociation (HCD) with the energy set at 32 NCE. The MS/MS spectra were acquired at a resolution of 35000 with a target value of  $1 \times 10^5$  ions or a maximum integration time of 100 ms. The fixed first  $m/z$  was 100, and the isolation window was 1.2  $m/z$ .

## 2.6 Data process

Protein identification and TMT quantification were performed using Proteome Discoverer 2.1 software (Thermo Scientific). Peptide sequences (and hence protein identity) were determined by matching protein databases (UniProt) with the acquired fragmentation pattern by SEQUEST HT algorithm. The precursor mass tolerance was set to 10 ppm and fragment ion mass tolerance to 0.02 Da. One missed cleavage site of trypsin was allowed. Carbamidomethyl (C) and TMT-<sup>2</sup>plex (K and N-terminal) were used as a fixed modification. Oxidation (M) was used as variable modifications. All spectra were searched against protein database using a target false discovery rate (FDR) of 1%. Identified proteins were additionally filtered by at least three spectral counts and one unique peptides in each experimental replicate. Protein ratios were calculated as the median of all peptide hits belonging to a protein. TMT ratios obtained from Proteome Discoverer 2.1 were transformed with  $\log_2(x)$  and then normalized using Z-score, and  $-\log_{10}(p\text{-value})$  of all proteins were obtained by a two-sided one sample t-test over two biological replicates. Only proteins identified have  $p\text{-values} < 0.05$  ( $-\log_{10}(p\text{-value}) > 1.3$ ) were considered as statistical significant.

## 2.7 Target validation by pull-down and western blot

Bound proteins on streptavidin beads from pull-down experiments as described in section 2.4 were eluted by boiling in SDS-PAGE sample loading buffer for 15 minutes and separated by SDS-PAGE. The following western blot analysis was performed as described above utilizing anti-ACLY and anti-GAPDH antibodies in section 2.2.

## 2.8 *In vitro* probe labeling of recombinant ACLY

Recombinant ACLY protein was ordered from Abcam. ACLY-C20S mutant was prepared according to previously reported procedures.<sup>2</sup> The protein was diluted to 0.05 mg/mL with PBS, pH 7.5. For each sample, 20  $\mu\text{L}$  of ACLY solution (1  $\mu\text{g}$ ) was incubated with different probes (DCV-yne, CV-yne, or IA-yne) as indicated at room temperature for 1 h. In the competitive labeling experiment of Fig. 3A, DCV was incubated with protein samples either after or before probe incubation for 2 h at room temperature; in that of Fig. 3B, DCV was incubated with protein samples before probe incubation for 2 h at room temperature; while in that of Fig. 3C, ATP was incubated with protein samples before probe incubation for 2 h at room temperature. Then, the samples were added with 1% SDS and the following click reaction and in-gel fluorescence scanning were performed as described

above in section 2.3.

## **2.9 Cellular thermal shift assay (CETSA)**

Jurkat cells were incubated with DCV (5  $\mu$ M) in PBS for 2 h. The medium was removed and cells were washed with PBS three times. Then the cells were suspended in PBS (1 mL) and aliquot into PCR tubes (each 250  $\mu$ L). The tubes were heated individually at various temperatures as indicated for 3 min followed by immediate cooling on ice for another 3 min. The cells were then lysed by freeze (dry ice)-thaw (25 °C water bath) for three cycles. The cell lysates were centrifuged at 18,000 g for 30 min at 4 °C to pellet the denatured and precipitated proteins. Soluble supernatants were analyzed by gel electrophoresis followed by immuno-blotting using ACLY and GAPDH antibodies as described in section 2.2 above.

## **2.10 ACLY enzymatic assay**

The known ACLY inhibitor BMS-303141 was ordered from MedChemExpress. Various concentrations of DCV or BMS-303141 dissolved in DMSO were incubated with 12.5  $\mu$ L of recombinant ACLY protein (20 ng) dissolved in 40 mM Tris-HCl, pH 8.0 at room temperature for 3 h. Proteins were added to 12.5  $\mu$ L of reaction mixture containing 40 mM Tris-HCl pH 8.0, 20 mM MgCl<sub>2</sub>, 5 mM DTT, 5 mM ATP, 0.2 mM CoA and 5 mM sodium citrate. The total volume of reaction is 25  $\mu$ L and the final concentration of DMSO is 1% in all reactions. The enzymatic reactions were conducted at 30 °C for 60 min. After the reaction, the amount of ADP was quantified using ADP-Glo luminescence assay kit (Promega) according to the manufacturer's instruction. The luminescence signal was measured using an EnVision Perkin Elmer microplate reader. Data analysis was performed with GraphPad Prism 7.0.

## **2.11 Knockdown by siRNA**

HeLa cells were transfected in OPTI-MEM with lipofectamin RNAiMAX (Invitrogen) with 20 nM of siRNA of ACLY or scrambled RNA (Dharmacon) for 24 h according to the manufacturer's protocols. The medium was removed and replaced for DMEM containing 10% FBS. Cells were treated with compounds as described in figure legends for 24 h in a 37 °C incubator. Cell viability was assessed by CellTiter-Glo<sup>®</sup> Luminescent Kit (Promega).

## **2.12 The effect of citrate/acetate on cell proliferation inhibitory effect of DCV**

Jurkat cells were cultured in full RPMI medium containing sodium citrate (1 mM) or sodium acetate (5 mM) for 24 h prior to drug treatment. The medium was aspirated and various concentrations of DCV dissolved in fresh sodium citrate- (1 mM) or sodium acetate- (5 mM) containing RPMI medium were added to cells and incubated for another 24 h. Cell viability was assessed by CellTiter-Glo<sup>®</sup> Luminescent Kit (Promega).

### 3. Chemistry

#### Materials

All the reagents were purchased commercially and used without further purification. Dehydrocurvularin and Curvularin were obtained according to *Ref 3*. Compounds **1** and **2** were obtained according to *Ref 4*.

Reactions were monitored by thin-layer chromatography (TLC) carried out on 0.25 mm Huanghai silica gel plates (HSGF254) using UV light as visualizing agent. Flash column chromatography was carried out using Yantai Xinnuo silica.

<sup>1</sup>H-NMR and <sup>13</sup>C-NMR spectra were recorded on a Bruker Ultrashield™ 400 PLUS (<sup>1</sup>H: 400 MHz, <sup>13</sup>C: 100 MHz) with chemical shift values in ppm relative to TMS ( $\delta_{\text{H}}$  0.00 and  $\delta_{\text{C}}$  0.00) and residual D-chloroform ( $\delta_{\text{H}}$  7.26 and  $\delta_{\text{C}}$  77.16) as standard. HR-MS were obtained using an Agilent 6520 Accurate-Mass Q-TOF instrument.

#### 3.1 Synthesis of DCV-yne

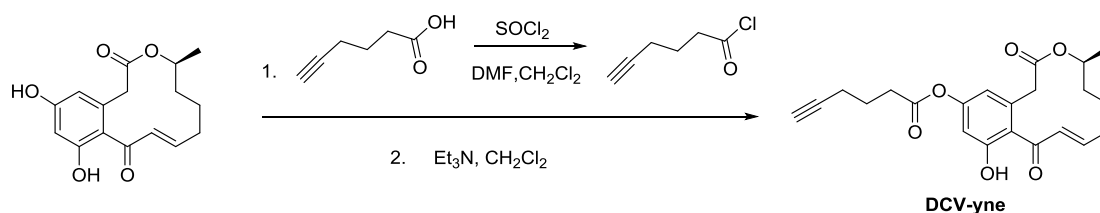

To the solution of 5-hexynoic acid (224 mg, 2 mmol) in dry  $\text{CH}_2\text{Cl}_2$  (10 mL) were added dropwise thionyl chloride (560  $\mu\text{L}$ , 8 mmol) and catalytic amounts of DMF with stirring. The mixture was stirred for 3h with reflux, and excess thionyl chloride and  $\text{CH}_2\text{Cl}_2$  was removed under vacuum. The residue was dissolved in  $\text{CH}_2\text{Cl}_2$  (30 mL). Dehydrocurvularin (10 mg, 0.0345 mmol) and triethylamine (140  $\mu\text{L}$ , 1 mmol) were added to the solution of acyl chloride (2 mL) with stirring. The reaction mixture was stirred for 4h at reflux, concentrated under *vacuum*. The residue was purified with flash column chromatography using trichloromethane/methanol (60:1) as an eluent to give crude products (4 mg), followed by reversed-phase semipreparative HPLC using a C18 chromatographic column (YMC-Pack-ODS-A 5 $\mu\text{m}$ , 4.6x250 mm) to afford DCV-yne (2.3 mg).

**DCV-yne:** Colorless amorphous powder, HR-ESI-MS  $m/z$  385.1645 [ $\text{M}+\text{H}$ ]<sup>+</sup> (calcd for  $\text{C}_{22}\text{H}_{25}\text{O}_6$  385.1651); <sup>1</sup>H NMR (400 MHz,  $\text{CDCl}_3$ ):  $\delta$  6.75 (1H, d,  $J=2.0$  Hz), 6.59 (1H, d,  $J=2.0$  Hz), 6.53-6.40 (1H, m), 6.24 (1H, d,  $J=16.0$  Hz), 4.98-4.86 (1H, m), 3.40 (2H, s), 2.59 (2H, t,  $J=7.4$  Hz), 2.41-2.30 (1H, m), 2.27 (2H, td,  $J=2.6, 6.9$  Hz), 2.24-2.14 (1H, m), 1.99 (1H, t,  $J=2.6$  Hz), 1.95-1.78 (4H, m), 1.56-1.39 (2H, m), 1.18 (3H, d,  $J=6.3$  Hz); <sup>13</sup>C NMR (100 MHz,  $\text{CDCl}_3$ ):  $\delta$  196.4, 171.3, 170.4, 157.9, 156.9, 148.4, 133.5, 132.4, 125.6, 115.5, 109.7, 83.0, 73.4, 69.4, 39.5, 34.5, 34.2, 32.7, 24.4, 23.4, 20.4, 17.7.

<sup>1</sup>H NMR spectrum of DCV-yne:

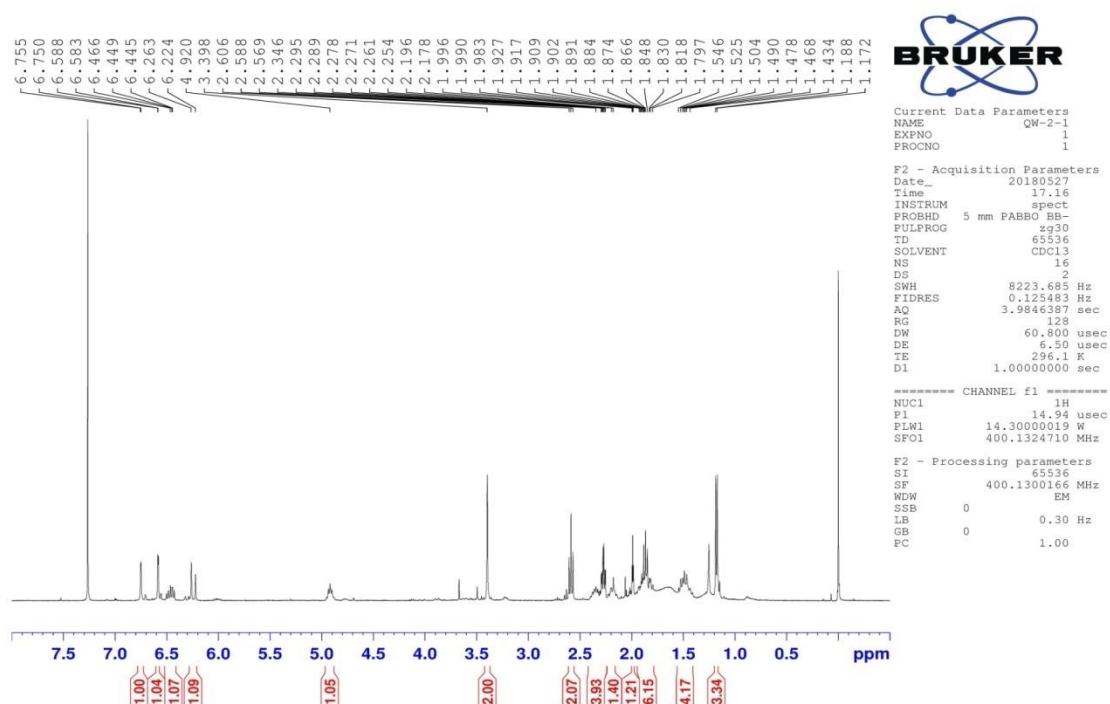

<sup>13</sup>C NMR spectrum of DCV-yne:

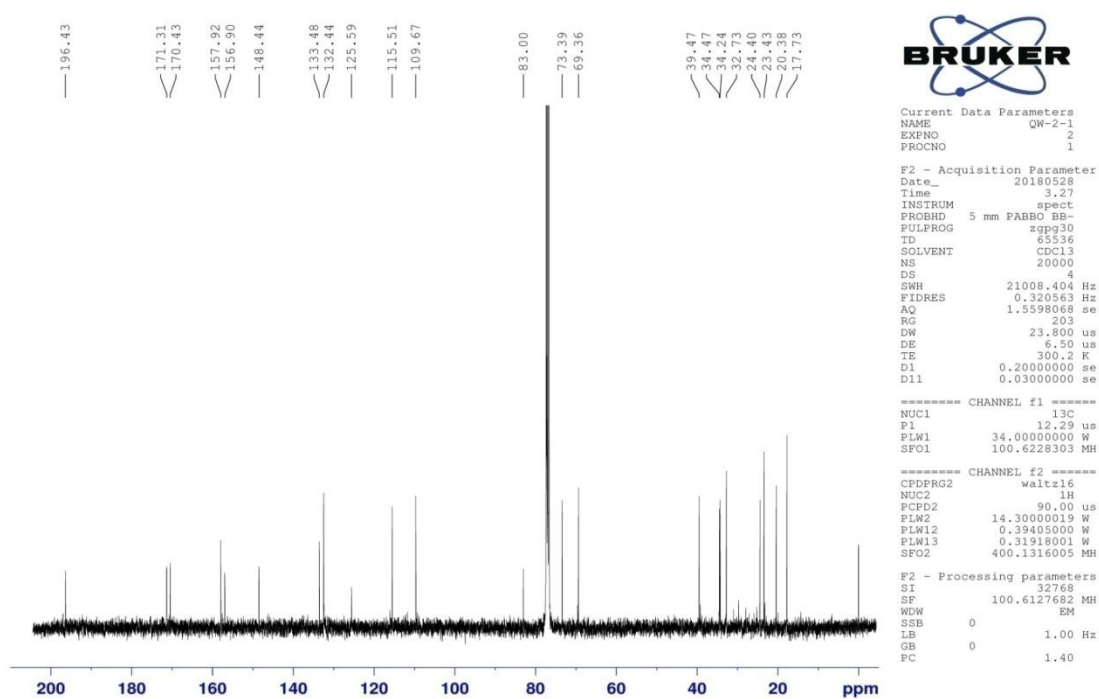

### 3.2 Synthesis of CV-yne.

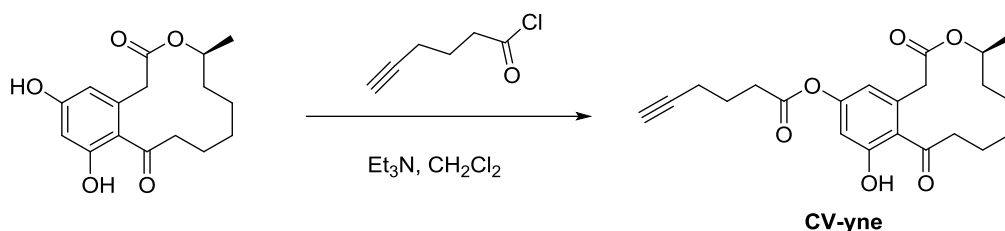

Curvularin (3.4 mg, 0.0116 mmol) and triethylamine (50  $\mu$ L, 0.357 mmol) were added to the solution of acyl chloride (1 mL) with stirring. The reaction mixture was stirred for 4h with reflux and concentrated under vacuum. The residue was purified with reversed-phase semi-preparative HPLC using a C18 chromatographic column (YMC-Pack-ODS-A 5  $\mu$ m, 4.6x 250 mm) to afford CV-yne (1.1 mg).

**CV-yne:** Colorless amorphous powder, HR-ESI-MS  $m/z$  387.1801  $[M+H]^+$  (calcd for  $C_{22}H_{27}O_6$  387.1808);  $^1H$  NMR(400 MHz,  $CDCl_3$ ):  $\delta$  6.68 (1H, d,  $J=2.2$  Hz), 6.60 (1H, d,  $J=2.2$  Hz), 5.14-5.04 (1H, m), 3.94 (1H, d,  $J=16.8$  Hz), 3.71 (1H, d,  $J=16.8$  Hz), 3.06 (1H, dt,  $J=7.1, 15.2$  Hz), 2.77 (1H, t,  $J=7.1$  Hz), 2.71 (2H, t,  $J=7.4$  Hz), 2.35 (2H, td,  $J=2.6, 6.9$  Hz), 2.02 (1H, t,  $J=2.6$  Hz), 1.96 (2H, qui,  $J=7.1$  Hz), 1.75-1.43 (6H, m), 1.42-1.31 (2H, m), 1.21 (3H, d,  $J=6.4$  Hz);  $^{13}C$  NMR (100 MHz,  $CDCl_3$ ):  $\delta$  207.9, 170.8, 170.2, 159.1, 153.0, 135.4, 122.9, 117.7, 109.7, 82.9, 72.4, 69.5, 42.8, 40.6, 33.0, 32.4, 26.9, 23.4, 23.0, 21.9, 20.1, 17.8.

$^1H$  NMR spectrum of CV-yne:

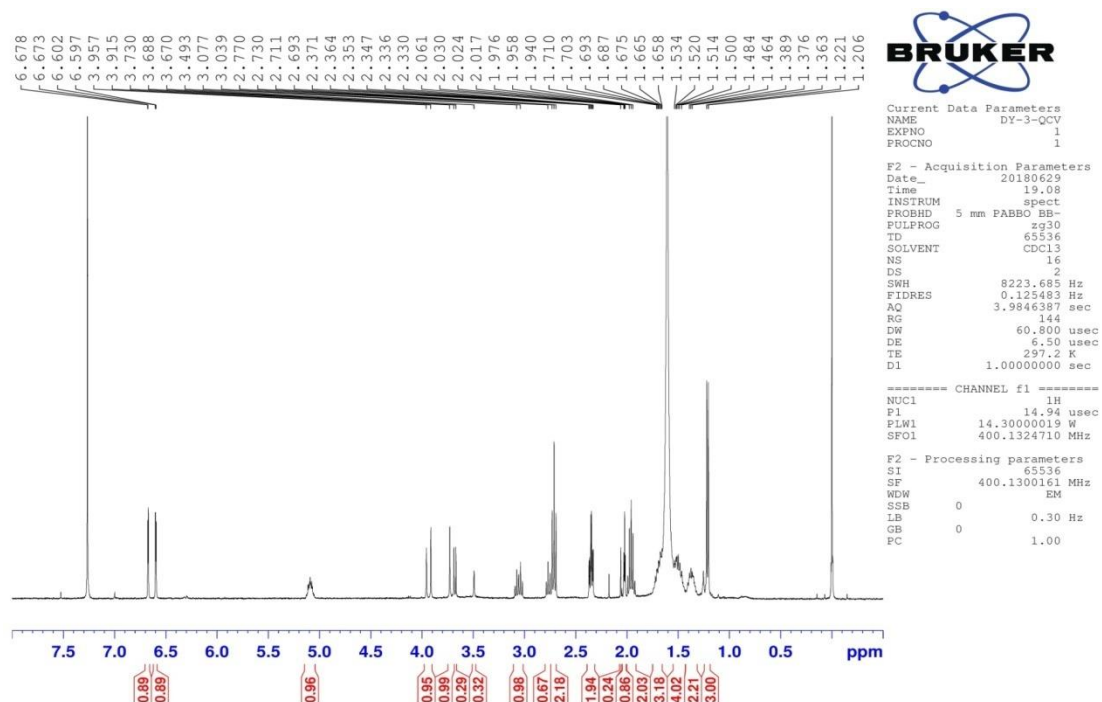

<sup>13</sup>C NMR spectrum of CV-yne:

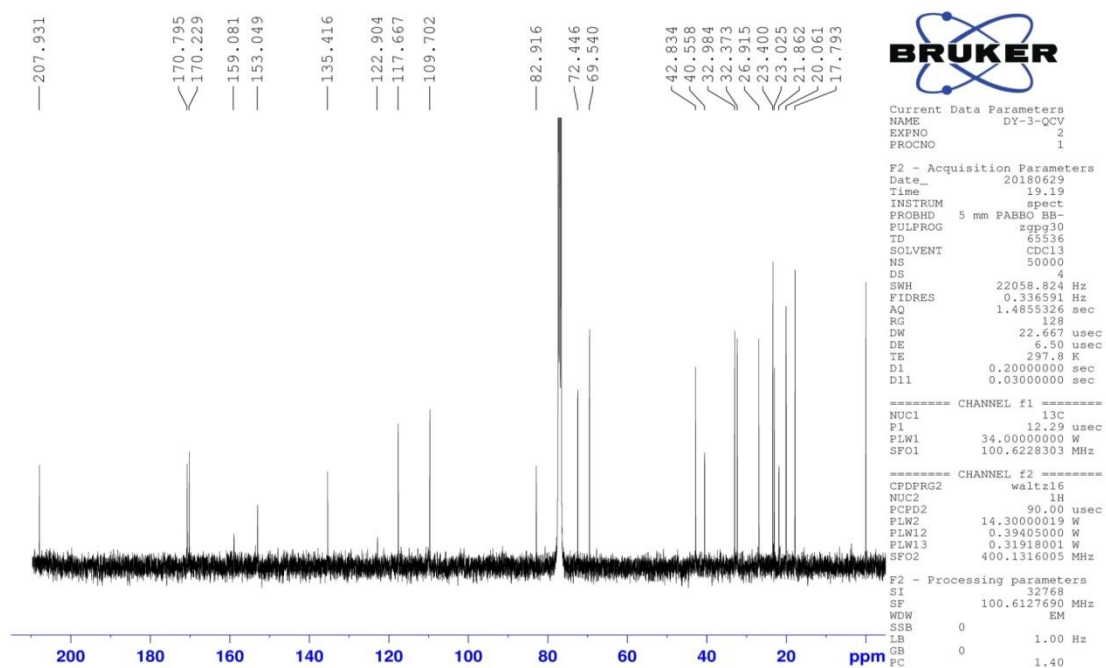

## 4. References

1. Wang J., Janas A., Olson W., Wu L. *J. Virol.*, **2007**, *81*, 8933–8943.
2. Hu J., Komakula A., Fraser, M. *Acta Cryst.* **2017**, *D73*, 660-671.
3. Deng Z., Deng A., Luo D., Gong D., Zou K., Peng Y., Guo Z. *Nat. Prod. Commun.* **2015**, *10*, 1277-1278.
4. Tauber J., Rohr M, Walter T., Schollmeyer D., Rahn-Hotze K., Erkel G., Opatz T. *ChemMedChem*, **2008**, *3*, 924-939.
